1 **Cooperative herbivory between two important**  
2 **pests of rice**

3

4 Qingsong Liu<sup>1,2†</sup>, Xiaoyun Hu<sup>1†</sup>, Shuangli Su<sup>1†</sup>, Yufa Peng<sup>1</sup>, Gongyin Ye<sup>3</sup>, Yonggen Lou<sup>3</sup>,  
5 Ted C. J. Turlings<sup>4</sup>, and Yunhe Li<sup>1\*</sup>

6

7 <sup>1</sup>State Key Laboratory for Biology of Plant Diseases and Insect Pests, Institute of Plant  
8 Protection, Chinese Academy of Agricultural Sciences, Beijing 100193, China.

9 <sup>2</sup>College of Life Sciences, Xinyang Normal University, Xinyang 464000, China.

10 <sup>3</sup>Institute of Insect Sciences, Zhejiang University, Hangzhou 310058, China.

11 <sup>4</sup>Laboratory of Fundamental and Applied Research in Chemical Ecology, University  
12 of Neuchâtel, Neuchâtel 2000, Switzerland.

13

14 <sup>†</sup>These authors contributed equally to this work.

15

16 **\*To whom correspondence should be addressed.**

17 Yunhe Li

18 No. 2 West Yuanmingyuan Road, Beijing, 100193, China

19 E-mail: [liyunhe@caas.cn](mailto:liyunhe@caas.cn)

20

21 **Abstract**

22 Normally, when different species of herbivorous arthropods feed on the same  
23 plant this leads to fitness reducing competition. We found this to be uniquely  
24 different for two of Asia's most destructive rice pests, the brown planthopper  
25 and the rice striped stem borer. Both insects directly and indirectly benefit from  
26 jointly attacking the same host plant. Double infestation improved plant quality,  
27 particularly for the stemborer because the planthopper fully suppresses  
28 caterpillar-induced production of proteinase inhibitors. It also drastically  
29 reduced the risk of egg parasitism, due to diminished parasitoid attraction.  
30 Females of both pests have adapted their oviposition behaviour accordingly.  
31 Their strong preference for plants infested by the other species even overrides  
32 their avoidance of plants already attacked by conspecifics. This uncovered  
33 cooperation between herbivores is telling of the exceptional adaptations  
34 resulting from the evolution of plant-insect interactions, and points out  
35 mechanistic vulnerabilities that can be targeted to control two major pests.

36

37 **Keywords:** *Nilaparvata lugens*, *Chilo suppressalis*, rice defense suppression,  
38 conventional interspecific competition theory, collaborative interaction

39

40

41 **Introduction**

42 Species that feed on the same resource are commonly regarded to be  
43 competitors<sup>1-3</sup>. In the great majority of cases, species that share a food  
44 resource negatively affect each other's performance, and the conventional  
45 interspecific competition theory is widely recognized for a diverse range of  
46 taxonomic groups including plants, birds, reptiles, marine invertebrates,  
47 insects and microbes<sup>1,4,5</sup>. Yet, there are instances of mutually beneficial  
48 interactions between species that feed on the same food source. This is mostly  
49 known for microbes that can assist other organisms in various ways to help  
50 reach, convert and digest food<sup>6-8</sup>. In very rare cases, higher organisms have  
51 also evolved cooperative interactions to be better exploit and share resources,  
52 as, for instance, has been shown for predators with complementary hunting  
53 tactics<sup>9-11</sup>.

54 Amongst arthropods, mutually beneficial interactions have been reported  
55 mainly for social insects with food providing partners<sup>12</sup>. The classic example is  
56 the symbiotic relationship between ants and aphids, in which aphids produce  
57 sugar-rich honeydew that is collected by the ants, and in exchange ants care  
58 for and protect the aphids from predators and parasitoids<sup>13,14</sup>. In none of these  
59 associations the arthropods share the same food sources, and we are not  
60 aware of any example of mutually beneficial exploitation of the same resources  
61 by arthropods.

62 The most commonly food sources shared among arthropods are plants, with  
63 virtually all plants being attacked by a number of different species. This has so  
64 far assumed to always lead to competition<sup>1,3</sup>. The extent of this competition  
65 can vary and the consequences can be highly asymmetrical, but in all reported  
66 examples the effects of feeding on the same plant are negative for at least one  
67 of the herbivores, independently of whether they are phylogenetically close,  
68 have the same mode of feeding, or feed on the same tissues<sup>1,15-18</sup>. In certain  
69 cases, one herbivore species can benefit from the presence of another  
70 herbivore species; for instance, by causing physiological changes in the plants

71 that make these plants less toxic and/or more nutritious<sup>16,17,19-22</sup> or by masking  
72 the (volatile) foraging cues used by natural enemies<sup>23-27</sup>. To our knowledge,  
73 however, there are no known examples of two species of herbivores both  
74 consistently benefitting from presence of each other on the same host plants.

75 It has been postulated that mutually beneficial interactions among species of  
76 insect herbivores must exist, but no specific examples have been uncovered  
77 yet<sup>20,28</sup>. It is one thing to demonstrate that two herbivores benefit from jointly  
78 feeding on the same plant, it is another to conclude that they actively pursue  
79 the plant mediated-benefits. Here we propose such a coevolved partnership  
80 between the brown planthopper (BPH), *Nilaparvata lugens* and the rice striped  
81 stem borer (SSB), *Chilo suppressalis*, two of the most devastating pests of rice  
82<sup>29</sup>. Our hypothesis that both insects benefit from attacking the same plant was  
83 prompted by our recent finding that BPH can escape parasitism of its eggs by  
84 preferentially ovipositing on rice plants that are already infested by SSB<sup>25</sup>. The  
85 apparent reason for this oviposition strategy is that, *Anagrus nilaparvatae*, the  
86 most common egg parasitoid of BPH, uses volatiles emitted by BPH-infested  
87 plants to locate plants with eggs. Plants that are co-infested by SSB release a  
88 different blend of volatiles that is not attractive to the parasitoid<sup>25</sup>. Previous  
89 work also indicates that SSB larvae perform poorly on rice plants that are  
90 already infested by conspecifics due to induced plant resistance, and that  
91 females show a strong oviposition preference for uninfested rice plants relative  
92 to SSB-infested rice plants, in accordance with the ‘mother knows best’  
93 principle<sup>30</sup>. BPH has been shown to suppress certain defenses in rice<sup>31,32</sup>.  
94 This raises the question whether sharing host plants with BPH can help SSB to  
95 counter the direct defenses of rice plants and possibly mitigate the defense  
96 responses to SSB infestation, and, if so, whether it also has adapted its  
97 oviposition behavior accordingly.

98 To answer these questions, we tested the performance of SSB larvae on  
99 uninfested rice plants, and plants infested either by BPH only, by SSB only, or  
100 by both species. We further tested if the oviposition preferences of SSB moths

101 matched the measured performances on the differently pre-infested plants.  
102 The results prompted us to investigate the potential molecular and biochemical  
103 mechanisms that may be involved, with a focus on protease inhibitors. To also  
104 address how BPH may affect the indirect defenses of rice plants against SSB,  
105 we further tested the odor preferences of *Trichogramma japonicum*, an  
106 important egg parasitoid of SSB, for differently treated plants. With these  
107 olfactometer assays and additional cage experiments we tested whether the  
108 presence of BPH can also reduce the risk of SSB moth eggs to be parasitized.  
109 The combined results support our hypothesis of a co-evolve cooperation  
110 between two intimately interacting herbivorous species that feed on the same  
111 plants, which exceptionally goes against conventional competition theory of  
112 interspecific interactions among phytophagous insects<sup>1</sup>. The elucidation of the  
113 underlying plant-mediated mechanisms that facilitate this cooperation can be  
114 the basis for plant breeding strategies to control the two exceedingly important  
115 rice pests.

116

## 117 **Results**

### 118 **Performance of SSB caterpillars on herbivore-infested rice plants**

119 When *C. suppressalis* larvae were allowed to feed for 7 days on rice plants  
120 that were either uninfested (control), infested by SSB larvae alone (SSB), BPH  
121 nymphs alone (BPH), or both SSB larvae and BPH nymphs (SSB/BPH), the  
122 body weight of SSB caterpillars was significantly different among the  
123 treatments ( $F_{3,165} = 8.462$ ,  $P < 0.001$ ) (Fig. 1a). The body weight of SSB larvae  
124 was significantly lower when fed on plants that had been infested by SSB  
125 larvae than on all other plant treatments (all  $P < 0.01$ ). Importantly, there was  
126 no difference in larval weight among the other three treatments (uninfested  
127 plants, feeding on BPH-infested plants or SSB/BPH-infested plants;  $P > 0.05$ ).  
128 These results imply that additional infestation by BPH fully eliminated the  
129 negative effects of SSB-infestation on successively feeding conspecifics. And  
130 this effect seems to be independent of infestation sequence, as weight gain

131 was only marginally different between SSB larval that were placed on dual  
132 infested plants, infested, with SSB treatment occurring either before or after  
133 BPH infestation ( $P = 0.051$ ) (Fig. 1b).

134

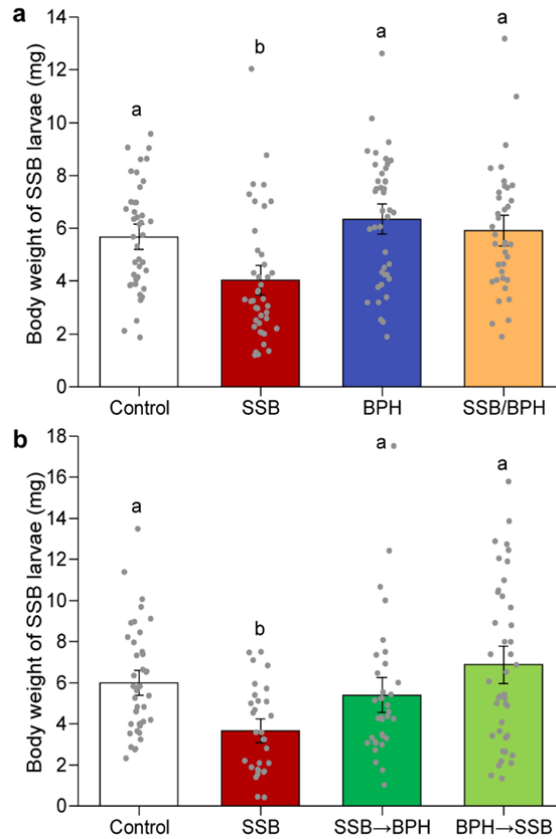

135

136 **Figure 1. Weight of SSB larvae after seven days of feeding on**  
137 **differentially infested rice plants.**

138 **a** Neonates of SSB were individually placed on rice plants that were either  
139 uninfested (Control), infested by SSB larvae only (SSB), BPH only (BPH), or  
140 both SSB and BPH (SSB/BPH, two species were simultaneously introduced to  
141 the plants); **b** Neonates of SSB were individually placed on rice plants that  
142 were either uninfested (Control), infested by SSB only, or both SSB and BPH  
143 in sequencing order (SSB→BPH, plants were infested with SSB larvae for 24 h  
144 then BPH were added for another 24 h; BPH→SSB, plants were infested with  
145 BPH for 24 h then SSB larvae were added for another 24 h). Bars indicate  
146 mean  $\pm$  SE. Data was analyzed using Two-way analysis of variance followed  
147 by LSD post hoc test. Small letters indicate significant differences between  
148 treatments ( $P < 0.05$ ) (N = 30–46).

149

150

151 **Oviposition preferences of SSB females**

152 ***Oviposition preference in greenhouse***

153 When given a choice between uninfested and SSB-infested plants, SSB  
154 females laid significantly fewer eggs on SSB-infested plants than on  
155 uninfested plants (RT-test applied to a GLMM, Poisson distribution error;  $P <$   
156  $0.001$ ) (Fig. 2a). However, compared to uninfested plants, the females strongly  
157 preferred to lay eggs on BPH-infested plants (RT-test applied to a GLMM,  
158 Poisson distribution error;  $P = 0.007$ ) (Fig. 2b) or on SSB/BPH-infested plants  
159 (RT-test applied to a GLMM, Poisson distribution error;  $P = 0.03$ ) (Fig. 2c). As  
160 expected, SSB females also laid significantly more eggs on BPH-infested or  
161 SSB/BPH-infested plants (RT-test applied to a GLMM, Poisson distribution  
162 error; both  $P < 0.001$ ) relative to SSB-infested plants (Fig. 2e, f), while they laid  
163 similar numbers of eggs on BPH-infested and SSB/BPH-infested plants (Fig.  
164 2g).

165 When SSB females were offered the 4 types of rice plants simultaneously,  
166 SSB females laid significantly different numbers of eggs among treatments  
167 (Fig. 2h; RT-test applied to a GLMM, Poisson distribution error;  $P < 0.001$ ),  
168 with the most eggs on plants infested by both SSB and BPH, and slightly less  
169 on BPH-infested plants and uninfested plants. Importantly, SSB females laid  
170 only very few eggs on SSB-infested plants, significantly less than on the other  
171 three treatment (all  $P < 0.001$ ) (Fig. 2h).

172

173

174

175

176

177

178

179

180

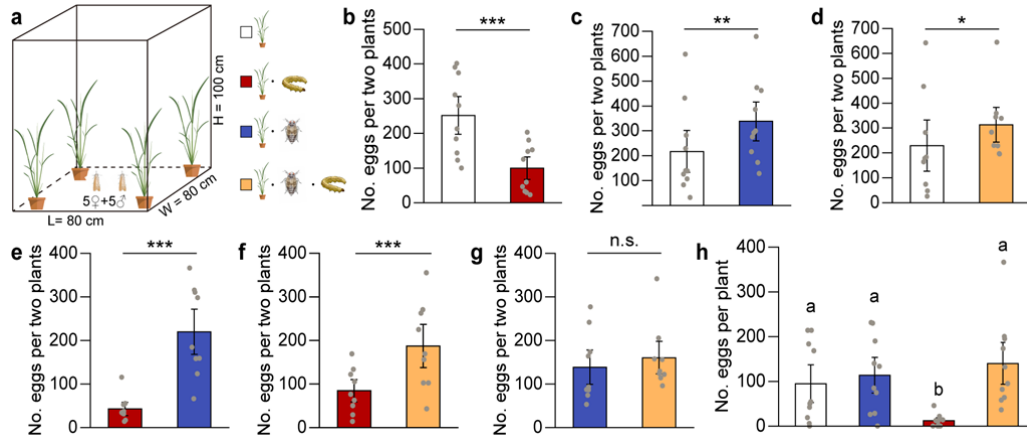

181

182 **Figure 2. Oviposition preference of SSB female moths in greenhouse**  
183 **experiments.**

184 Number of eggs laid by female *C. suppressalis* on rice plants that were either  
185 uninfested (Control), infested by SSB larvae only (SSB), BPH only (BPH), or  
186 by both SSB and BPH (SSB/BPH). **a** Schematic drawing of the oviposition  
187 experiments. **b** Control versus SSB larva-infested plants. **c** Control versus  
188 BPH-infested plants. **d** Control versus dually infested plants. **e** SSB  
189 larva-infested plants versus BPH-infested plants. **f** SSB larva-infested plants  
190 versus dually infested plants. **g** BPH-infested plants versus dually infested  
191 plants. **h** SSB female moths were exposed to 4 types of rice plants together. LR  
192 tests applied to a GLMM were conducted for the number of eggs (Poisson  
193 distribution error). Each bar represents the mean  $\pm$  SE. Data columns with  
194 asterisks (\*\*\*)  $P < 0.001$ , (\*\*)  $P < 0.01$ , (\*)  $P < 0.05$ , or with small letters ( $P < 0.05$ )  
195 indicate significant differences between treatments; n.s. indicates a  
196 non-significant difference ( $P > 0.05$ ) (N = 9–11).

197

198 ***Oviposition preferences under field conditions***

199 Consistent with the results from the greenhouse experiments, far more eggs  
200 were laid on uninfested plants than on SSB-infested plants (RT-test applied to  
201 a GLMM, Poisson distribution error;  $P < 0.001$ ) (Fig. 3a). Compared to  
202 uninfested rice plants, the females preferred to lay eggs on BPH-infested  
203 plants ( $P < 0.001$ ) or SSB/BPH-infested plants ( $P = 0.03$ ) (Fig. 3b, c). When  
204 given a choice between SSB-infested plants and SSB/BPH-infested plants, the  
205 females preferred to lay eggs on the co-infested plants, as expected (RT-test  
206 applied to a GLMM, Poisson distribution error;  $P < 0.001$ ) (Fig. 3d).

207



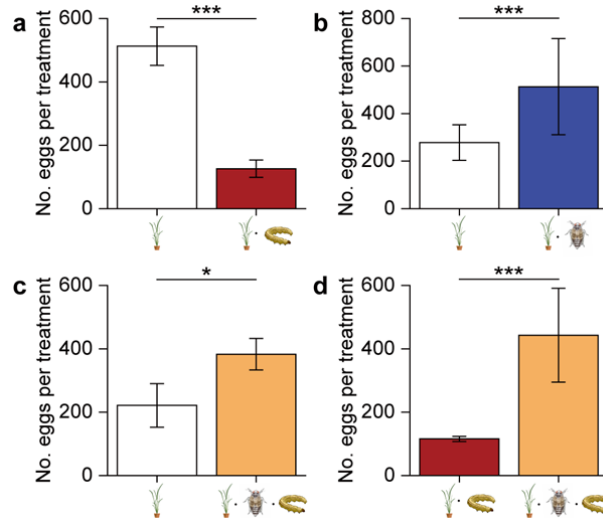

208

209 **Figure 3. Oviposition preference of SSB female moths in field cage**  
210 **experiments.**

211 Number of eggs laid by female *C. suppressalis* on rice plants that were either  
212 uninfested (Control), infested by SSB larvae only (SSB), BPH only (BPH), or  
213 both SSB and BPH (SSB/BPH). **a** Control versus SSB larva-infested plants. **b**  
214 Control versus BPH-infested plants. **c** Control versus dually infested plants. **d**  
215 SSB larva-infested plants versus dually infested plants. LR tests applied to a  
216 GLMM were conducted for the number of eggs (Poisson distribution error).  
217 Each bar represents the mean  $\pm$  SE. Data columns with asterisks (\*\*\*)  $P < 0.001$ ,  
218 \*  $P < 0.05$ ) indicate significant differences between treatments (N = 3–4).

219

## 220 Rice plant defense responses to herbivore infestation

### 221 Gene expression changes

222 RNA-seq analysis was carried out to assess gene expression changes in  
223 response to infestation by SSB, BPH or both species. A partial least squares  
224 discriminant analysis on all 12 transcriptomic datasets provided a global view  
225 of the total gene expression across the four treatments. As shown in Fig. 4a,  
226 the first two principal components (PCs) explained 39.5% (PC1), and 13.3%  
227 (PC2) of the total variance, respectively. PC1 revealed a clear separation of  
228 samples with SSB infestation (SSB and SSB/BPH) from others (BPH and  
229 control). And PC2 separated samples with BPH infestation (BPH and  
230 SSB/BPH) from others (SSB and control). Taken together, these results  
231 suggest that each infestation regime had distinctly different effects on the gene  
232 expression of rice plants.

233 The gene expression analyses showed that feeding by SSB resulted in the  
234 differential expression of 12512 genes (absolute  $\log_2(\text{fold change}) > 0$  and  $P <$   
235  $0.05$ ), of which 6533 genes were up-regulated and 5979 genes  
236 down-regulated. Infestation by BPH alone induced a relative weak response of  
237 rice plant, that is, 2523 differentially expressed genes including 1292  
238 upregulated genes and 1231 downregulated genes. Co-infestation by the two  
239 species induced the upregulation of 3640 genes and the downregulation of  
240 4082 genes (Fig. 4b). Interestingly, compared to SSB-infested plants, 992  
241 genes were downregulated when plants were co-infested with BPH and SSB,  
242 and the gene ontology (GO) enrichment analysis showed that these repressed  
243 genes were largely associated with defense responses, such as JA-related  
244 process, and enzyme inhibitor activity (Supplementary Data 1).

245

#### 246 ***JA and SA associated gene expression and their accumulation***

247 A total of 10392 *Arabidopsis* orthologs of rice genes were included in  
248 phytohormone-related gene expression signatures (Supplementary Data 2).  
249 The results showed that, when compared to uninfested plants, genes  
250 associated with JA and SA pathways were generally upregulated in plants  
251 infested by SSB larvae, BPH nymphs, or both species (Fig. 4c). However, dual  
252 infestation by SSB and BPH resulted in an apparent downregulation of both JA  
253 and SA pathways in rice, as when compared to SSB-infested plants.  
254 Specifically, four genes involved in JA biosynthesis, *OsLOX9*, *OsJAR1;2*,  
255 *OsDAD1;3*, and *OsAOC*, were significantly induced upon SSB infestation but  
256 were not induced when plants were co-infested by both BPH and SSB  
257 (Supplementary Data 3). More surprisingly, two genes involved in JA pathway,  
258 *OsLOXL-2* and *OsAOS3*, and nine SA-responsive genes (*OsPR2*, *OsPR4*,  
259 *OsPR4B*, *OsPR4C*, *OsPR4D*, *OsPR6*, *OsPR10*, *OsPR10A*, and *OsPR10B*)  
260 were activated by SSB infestation, but were suppressed by dual infestation  
261 (Supplementary Data 4).

262 Consistent with the phytohormone-related gene expression results, SSB

263 infestation induced a significant increase in the levels of both JA (12 hr vs. 0 hr,  
264  $P < 0.001$ ; 24 hr vs 0 hr,  $P < 0.001$ ) and SA (12 hr vs. 0 hr,  $P < 0.001$ ; 24 hr vs 0  
265 hr,  $P = 0.004$ ; Fig. 4d, e). However, when BPH nymphs were added after 12 hr  
266 infestation by SSB alone, the levels of JA and SA in rice plants significantly  
267 decreased (JA:  $P = 0.02$ ; SA:  $P < 0.001$ ; Fig. 4d, e).

268

### 269 ***Protease inhibitor-associated gene expression and their accumulation***

270 When determining GO terms that were significantly enriched ( $P_{adj} < 0.05$ ) in  
271 the set of 992 downregulated DEGs comparing dual infestation samples and  
272 SSB infestation samples, we identified several molecular function terms that  
273 were associated with protease inhibitor activity including serine-type  
274 endopeptidase inhibitor activity (GO:0004867), enzyme inhibitor activity  
275 (GO:0004857), endopeptidase inhibitor activity (GO:0004866), peptidase  
276 inhibitor activity (GO:0030414) (Supplementary Data 1). After screening for  
277 genes involved in these categories, we found 11 genes related to protease  
278 inhibitors that were highly induced by SSB infestation, but were significantly  
279 attenuated by the additional infestation of BPH nymphs (Fig. 4f). The  
280 expression of nine genes was validated by qRT-PCR, showing similar  
281 expression patterns among the four treatments as obtained with RNA-seq  
282 (Supplementary Fig. 1), confirming the reliability of the RNA-seq data.

283 Prompted by the observed changes in protease inhibitor-associated gene  
284 expression, we further measured the contents of TPIs in rice plants responding  
285 to different herbivore infestations. The results showed a significant increase in  
286 TPIs content after 72 hr SSB infestation compared to uninfested plants ( $P =$   
287  $0.03$ ). This TPIs content increase was not observed for BPH-infested plants or  
288 SSB/BPH-infested plants (Fig. 4g).

289

290

291

292

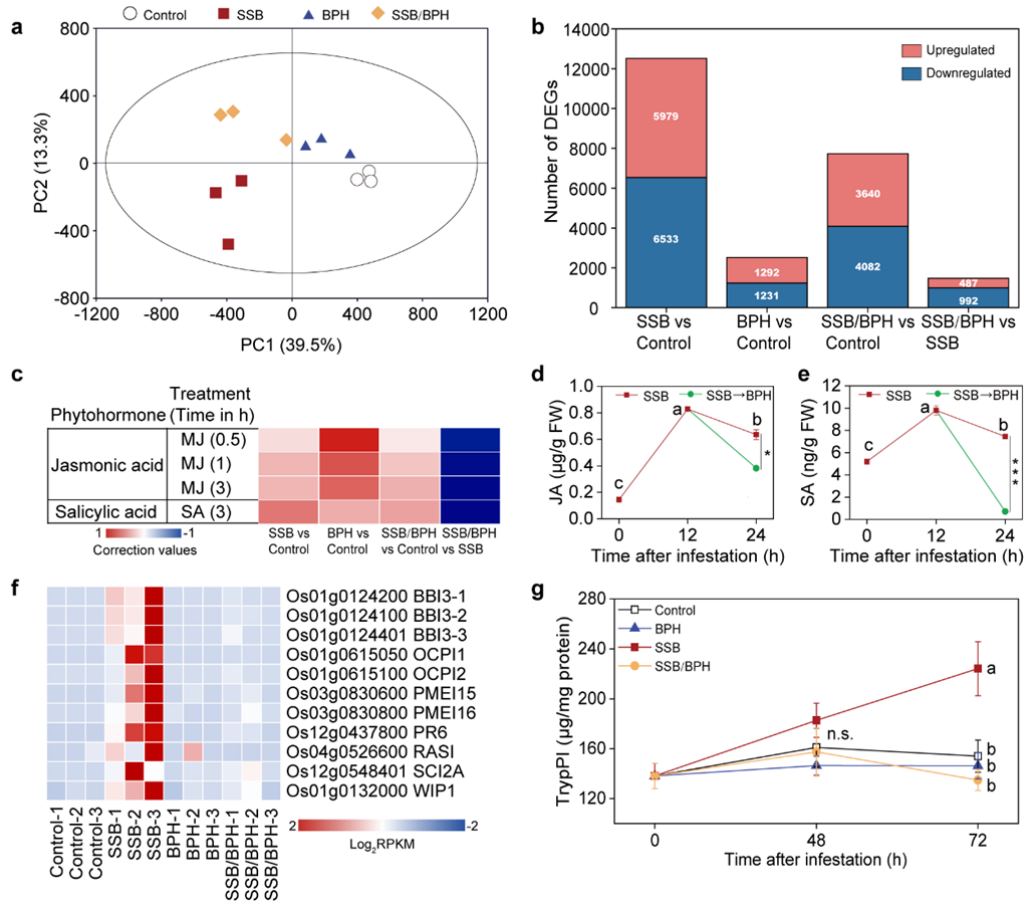

293

294 **Figure 4. Rice plant responses to herbivore infestation.**

295 **a** Partial least squares discriminant analysis (PLS-DA) of all detected genes in  
 296 rice plants that were either untreated (control), infested by SSB, BPH, or both  
 297 herbivores (SSB+BPH) for 48 h (three biological replicates per treatment). The  
 298 percentage of variation of the data explained by principal component 1 (PC1)  
 299 and PC2 is in parentheses (39.5 and 13.3%, respectively). The score plot  
 300 displays the grouping pattern according to the first two PCs and the ellipse  
 301 defines the Hotelling's T2 confidence interval (95%) for the observations. **b**  
 302 Differentially expressed genes among differently treated rice plants. **c**  
 303 Hormonometer analyses for JA and SA signatures based on transcriptomic  
 304 responses of rice to herbivory. The colors indicate similarity between herbivore  
 305 infestation and a particular hormone response (blue and red for negative and  
 306 positive correlations, respectively, see bottom). MJ, methyl jasmonate; SA:  
 307 salicylic acid. The contents of endogenous JA (**d**) and SA (**e**) in rice plants  
 308 subjected to SSB infestation or SSB plus BPH in sequence. Letters indicate  
 309 significant differences among SSB treatment with different time points;  
 310 asterisks indicate significant differences between SSB and SSB→BPH  
 311 treatments ( $P < 0.01$ ;  $N = 3$ ). Bars indicate mean  $\pm$  SE. **f** Heatmap of the  
 312 expression of 10 enzyme inhibitors genes.  $\text{Log}_2$ -transformed RPKM values are  
 313 plotted. BBI 3-1, Bowman-Birk inhibitor 3-1; BBI 3-2, Bowman-Birk inhibitor 3-2;

314 BBI3-3, Bowman-Birk inhibitor 3-3; OCPI1, *Oryza sativa* chymotrypsin  
315 inhibitor-like 1; OCPI2, *Oryza sativa* chymotrypsin inhibitor-like 2; PME1 15,  
316 pectin methylesterase inhibitors 15; PME1 16, pectin methylesterase inhibitors  
317 16; PR6, pathogenesis-related proteins 6; RASI, rice alpha-amylase/subtilisin  
318 inhibitor; SCI2A, subtilisin-chymotrypsin inhibitor-2A; WIP1, wound-induced  
319 protease inhibitor. FPKM, fragments per kilobase of transcript per million  
320 fragments mapped. **g** Time course of the contents of trypPI in rice plants that  
321 were either uninfested (Control), infested by SSB, BPH, or both (N=3). Bars  
322 indicate mean  $\pm$  SE. Data was analyzed using one-way ANOVA followed by  
323 LSD post hoc test. Letters indicate significant differences between treatments  
324 ( $P < 0.05$ ). n.s., not significant ( $P > 0.05$ ).

325

### 326 **Volatile profiles of rice plants and their effects on the oviposition** 327 **behavior of SSB females**

328 A total of 61 compounds were detected in the headspace of the four plant  
329 treatments (Supplementary Data 5). Plants infested by both SSB and BPH  
330 emitted the highest amounts of volatiles, followed by plants infested by SSB,  
331 plants infested by BPH, whereas control plants emitted the lowest amounts of  
332 volatiles. A projection to partial least squares-discriminant analysis (PLS-DA)  
333 using the contents of all detected volatiles showed a clear separation among  
334 the four treatments (Fig. 5a). The first two significant principle components  
335 (PCs) explained 33.8% and 7.44% of the total variance, respectively.  
336 Consistent with gene expression data, the first PC showed a clear separation  
337 between plant infested with SSB (SSB and SSB/BPH) from others (BPH and  
338 control), and the second PC separated BPH-infested samples and  
339 SSB-infested samples (BPH and SSB) from others (SSB/BPH and control).

340 Using volatiles that had been collected from plants subjected to the four  
341 types of treatments as odor sources (applied on filter paper strips), we tested  
342 the oviposition preference of SSB females. They differently distributed their  
343 eggs among the four treatments (Fig. 5b, RT-test applied to a GLMM, Poisson  
344 distribution error;  $P < 0.001$ ), with highest number of eggs observed on or near  
345 filter paper that had been treated with volatiles collected from  
346 SSB/BPH-infested plants, which was statistically similar to the numbers of

347 eggs laid on BPH-infested plants and uninfested plants. However, SSB  
348 females laid significantly lower numbers of eggs on filter paper treated with  
349 volatiles collected from SSB-infested plants compared to any of the other  
350 treatment (all  $P < 0.001$ ) (Fig. 5b).

351

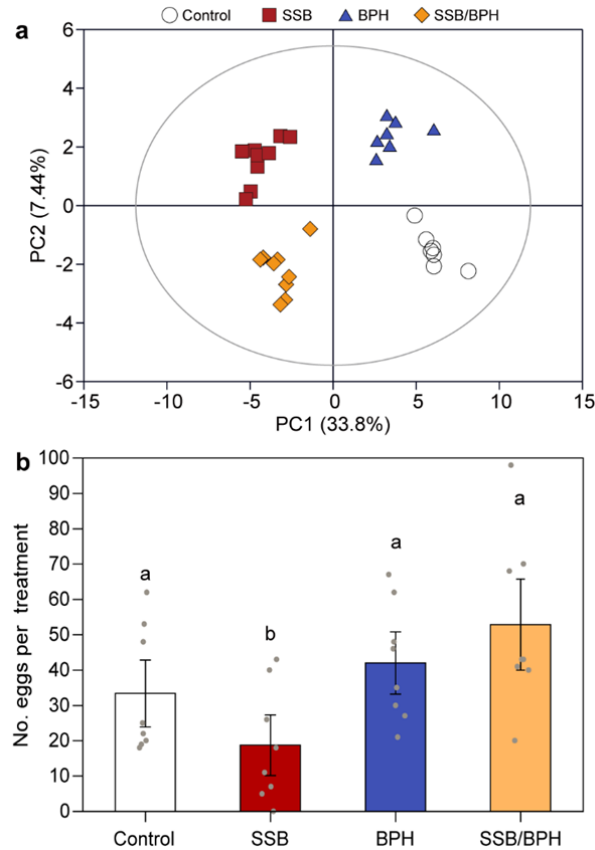

352

353 **Figure 5. Volatiles released by rice plants and effect on oviposition**  
354 **behavior of *C. suppressalis* female.**

355 **a** Projection to latent structures-discriminant analysis (PLS-DA) of volatile  
356 emissions produced by rice plants that were either untreated (Control),  
357 infested by SSB, BPH, or both herbivores (SSB/BPH) for 48 h. The score plot  
358 display the grouping pattern according to the first two components and the  
359 ellipse defines the Hotelling's T2 confidence interval (95%) for the  
360 observations. **b** Number of eggs laid by female *C. suppressalis* on filter paper  
361 that had been treated with volatiles collected from 4 types of differently treated  
362 rice plants. LR tests applied to a GLMM were conducted for the number of  
363 eggs (Poisson distribution error). Each bar represents the mean  $\pm$  SE. Letters  
364 above bars indicate significant differences between treatments (RT-test  
365 applied to a GLM, Poisson distribution error;  $P < 0.05$ ; N = 8).

366

367

### 368 **Responses of *T. japonicum* wasps to herbivore-infested rice plants**

369 In a dual-choice assay, the *T. japonicum* wasps showed a strong preference for  
370 plants infested by SSB eggs ( $P = 0.004$ ) over uninfested intact plants (Fig. 6a).  
371 When offered plants carrying SSB eggs in both sides of the olfactometer, the  
372 wasps exhibited a significant preference for plants that were additionally  
373 infested by SSB larvae relative to plants infested by SSB eggs alone ( $P =$   
374  $0.002$ ). In contrast, the wasps were significantly more attracted to plants with  
375 eggs alone than plants that were additional infested by BPH nymphs ( $P <$   
376  $0.001$ ) or both SSB larvae and BPH nymphs ( $P = 0.001$ ). We further tested the  
377 preferences of wasps that were offered plants with combinations of herbivore  
378 and egg infestation. The results (Fig. 6a) showed that *T. japonicum* females  
379 significantly preferred to rice plants with SSB and eggs over plants coinfeasted  
380 by BPH and eggs ( $P < 0.001$ ) or plants with SSB, BPH, and eggs ( $P = 0.01$ ).  
381 Finally, as expected, the wasps showed a significant preference for the odor of  
382 plants with the combination of SSB, BPH, and eggs over the odor of plants  
383 with BPH and eggs ( $P = 0.009$ ). These results imply that additional infestation  
384 by BPH resulted in the repellence of *T. japonicum* wasps.

385

### 386 **Parasitism rates of SSB eggs by *T. japonicum* wasps**

387 In the greenhouse cages with the four plant treatments, the rate of parasitism  
388 of SSB eggs by *T. japonicum* wasps were highest on plants infested with SSB  
389 larvae only (Fig. 6b), which was significantly higher than on plants infested with  
390 BPH only ( $P < 0.001$ ) or plants infested with both herbivore species ( $P = 0.016$ ).  
391 The lowest parasitism rate of SSB eggs was observed on plants infested by  
392 BPH only. Although parasitism was lower on plants infested by both species,  
393 this was not significant different from parasitism on control plants ( $P = 0.28$ ).  
394 The parasitism rates of SSB eggs in the cages nicely reflected the trends of  
395 responses of the parasitoids in the olfactometer (Fig. 6b).

396



397

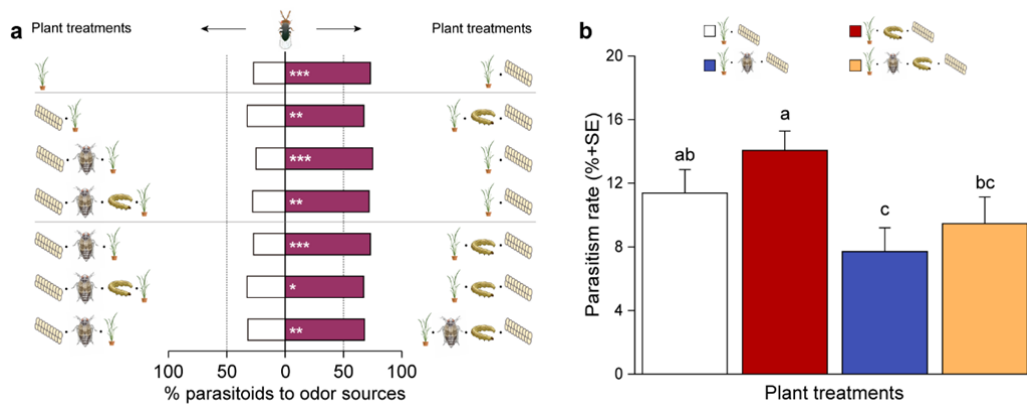

398

399 **Figure 6. Preferences of females of the egg parasitoid *Trichogramma***  
400 ***japonicum*.**

401 **a** Choice of *T. japonicum* wasps when offered the odor of differently treated  
402 plants in a Y-tube olfactometer. Bars represent the percentages of wasps  
403 choosing either of the odor sources. Asterisks indicate significant differences  
404 from a 50:50 distribution (binomial test: \*  $P < 0.05$ , \*\*  $P < 0.01$ , \*\*\*  $P < 0.001$ ; N  
405 =58-80). **b** Parasitism rates of SSB eggs by *T. japonicum* in the greenhouse  
406 experiments. The proportions data was subjected to an arcsin square-root  
407 transformed before analyses. Each bar represents the mean  $\pm$  SE. Letters  
408 above bars indicate significant differences between treatments (likelihood ratio  
409 test applied to a generalized lineal model;  $P < 0.05$ ; N = 12).

410

## 411 Discussion

412 Defining *cooperation* as “any interaction in which an actor confers a fitness  
413 benefit to another individual and receives an (inclusive) fitness benefit in  
414 return”<sup>33</sup>, we may conclude that the observed mutually beneficial interactions  
415 between SSB and BPH indeed represent a unique example of cooperation  
416 between two herbivores. We found that not only do the herbivores directly  
417 (mitigated plant toxicity) and indirectly (reduced exposure to parasitoids)  
418 benefit from jointly attacking plant, we also found that both have adapted their  
419 host plant selection and oviposition behavior to optimize the benefits that they  
420 derive from each other.

421 Our previous work shows that BPH prefers to feed and lay eggs on  
422 SSB-infested rice plants, which are more nutritious and on which their eggs  
423 escape parasitism<sup>25,34</sup>. The current study demonstrates similar, even stronger



424 benefits for SSB when infesting plants that are already under attack by BPH.  
425 The feeding assays show that SSB infestation induces rice defense responses  
426 that cause significantly reduced fitness in SSB larvae that subsequently feed  
427 on the same plants (Fig. 1). Remarkably, additional infestation by BPH  
428 completely neutralized the negative effects of SSB defense induction; SSB  
429 caterpillars placed on plants already infested by conspecifics grew  
430 considerably better on plants that were also attacked by BPH, independent of  
431 order of infestation. On BPH-infested plants the caterpillars performed just as  
432 well as on previously uninfested control plant (Fig. 1)

433 RNA-seq and biochemical analyses showed that infestation by BPH  
434 suppresses a broad spectrum of defense related genes (Fig. 4f,  
435 Supplementary Data 1), with one of the main consequences being a significant  
436 reduction in SSB-induced production of proteinase inhibitors (Fig. 4g). These  
437 are key defensive compounds of rice plants that are particularly effective  
438 against chewing herbivores, including SSB <sup>35,36</sup>. We also found that  
439 co-infestation with BPH suppresses the expression of SA- and JA-associated  
440 genes that are normally upregulated by SSB infestation (Fig. 4c,  
441 Supplementary Data 4). This suppression led to reduced levels of JA and SA in  
442 the plants (Fig. 4d, e). The JA signal transduction pathway is responsible for  
443 the production of TPIs in rice plant, and it is known that SSB performs better on  
444 JA-deficient mutant rice lines mainly due to reduced TPIs levels <sup>36,37</sup>.  
445 Collectively, this insight explains why BPH feeding neutralizes the negative  
446 effects of SSB defense induction.

447 Insect attack typically induces defense responses in plants <sup>38-41</sup>, but it is  
448 also increasingly evident that various insect herbivores have the ability to, at  
449 least partially, suppress plant defenses by interfering with JA or SA  
450 biosynthesis and that this can enhance their own performance and that of  
451 conspecifics <sup>28,42-45</sup>. This can also benefit certain other species that feed on the  
452 same plants. For example, the silverleaf whitefly (*Bemisia tabaci*) activates SA  
453 signaling and represses JA-regulated defenses, leading to enhanced nymphal

454 development of this insect<sup>28</sup>, which also benefits spider mites<sup>26</sup>. None of  
455 these studies appear to show reciprocal benefits for species feeding on the  
456 same plant.

457 Consistent with ‘mother knows best’ hypothesis<sup>46</sup>, SSB females avoid to lay  
458 eggs on rice plants that are already infested by conspecifics, thus ensuring  
459 that their offspring evade the negative effects that SSB-induced defenses<sup>30</sup>.  
460 Here we show that SSB females have adapted their oviposition behavior to  
461 preferentially oviposit on BPH-infested rice plants, independent of whether  
462 SSB larvae are already present or not, as compared to healthy plants (Figs. 2  
463 and 3). By doing so, they benefit from the BPH-mediated suppression of rice  
464 defense responses (Fig. 1a). However, the performance of SSB larvae was not  
465 any better on rice plants that were already co-infested by SSB plus BPH  
466 compared to their performance on healthy plants. So why did SSB females  
467 prefer to lay eggs on dual-infested plants rather than on healthy plants (Fig.  
468 2d)? The experiments with the egg parasitoid *T. japonicun* provide a plausible  
469 explanation, as they showed that the presence of BPH significantly reduced  
470 the attractiveness of rice plants to the wasp (Fig. 6a). The cage experiment  
471 confirmed that the presence of BPH decreased the risk for SSB eggs to be  
472 parasitized, implying that the oviposition strategy of SSB females is highly  
473 adaptive (Fig. 6b).

474 It appears that certain well-adapted herbivores can also manipulate the  
475 emission of volatiles of their host plants<sup>47</sup>. In most such cases, herbivore  
476 infestation suppresses certain key volatile compounds and thereby possibly  
477 reduce the attractiveness of plants to certain natural enemies<sup>26,27,42,48,49</sup>. Other  
478 herbivores can benefit from this as well. Simultaneous feeding by slugs, for  
479 instance, suppress caterpillar-induced volatiles in cabbage plants, thereby  
480 reducing the attractiveness of the plants to parasitoids<sup>27</sup>. Similarly, when  
481 spider mite-infested Lima bean plants are also infested by whiteflies this leads  
482 to a reduced emission of the volatile (E)- $\beta$ -ocimene compared to plants  
483 infested by spider mites only, resulting in a reduced attraction of predatory

484 mites<sup>26</sup>. In other cases, double infestation may actually lead to higher  
485 quantities of volatiles being emitted, but the blend is altered in a way that it is  
486 no longer attractive to parasitoids<sup>23</sup>. This is also the case for our study system.  
487 We previously showed that BPH preferentially oviposits on SSB-infested rice  
488 plants, thereby avoiding the attraction of the egg parasitoid *Anagrus*  
489 *nilaparvatae*<sup>25</sup>. These various examples confirm that insect herbivores not  
490 only can evolve the ability to use volatiles to identify host plants of better  
491 nutritional quality, but also plants where their offspring can escape natural  
492 enemies<sup>50</sup>.

493 Our combined results, including the additional tests showing that SSB  
494 infestation of rice plants significantly increases the performance of BPH  
495 nymphs (Supplementary Fig.2) strongly supported the conclusion of mutually  
496 beneficial interaction between SSB and BPH. This goes against the ingrained  
497 notion of competition between phytophagous insects that share a common  
498 host plant, and how this competition shapes insect assemblages<sup>1,15,17,51-53</sup>.  
499 The resource-based competition theory has been challenged before, but the  
500 examples involve specific asymmetric beneficial plant-mediated interactions,  
501 meaning that only one of the herbivore species benefits from the presence of  
502 another<sup>20,21,54-58</sup>. In these cases, the benefit is never reciprocal, nor do they  
503 seem to represent tightly coevolved interactions with specific behavioral  
504 adaptations as found for BPH and SSB in the current study and certain  
505 vertebrates<sup>9-11</sup>.

506 The interaction between SSB and BPH reported here seems to represent a  
507 highly evolved collaboration to cope with and exploit the direct and indirect  
508 defense responses of rice plants. The two species share the same host plants  
509 and have a similar spatial and temporal distribution throughout Asia's rice  
510 paddy area<sup>(25; <https://www.cabi.org/isc/>)</sup>. Why has their interaction evolved  
511 into collaboration rather than competition? It is likely because of their  
512 differential feeding strategies. Although the two insects occur side-by-side on  
513 rice plants, SSB is a stemborer insect that feeds inside the rice plants, while

514 BPH is a phloem-sucking insect that feeds at the surface on leaf blades and  
515 leaf sheaths <sup>25,59</sup>. Hence, there is usually no direct physical interaction  
516 between the two species. During the coevolutionary arms race between  
517 herbivores and host plants, both sides may evolve multiple defense  
518 mechanisms against the other. We speculate that the cooperative relationship  
519 between SSB and BPH may be the result of two opposing coevolutionary arms  
520 races that in combination benefit both herbivores.

521 Although the mutually beneficial interaction between the stem borer and  
522 planthopper bears no resemblance to any of the known interactions between  
523 other herbivore species attacking a same plant <sup>1,15</sup>, the reported type of  
524 cooperation is unlikely to be unique. We postulate that agricultural pests are  
525 especially prone to rapid evolutionary changes that allow such cooperation to  
526 emerge. As pest populations build up in vast monocultures their main  
527 challenges revolve around coping with plant defenses and avoiding and  
528 resisting their specific natural enemies, whereas finding host plants is no  
529 longer a challenge. In such scenarios, different insect species will encounter  
530 each other frequently. Unlike the cultivated plants, the insects are subject to  
531 natural selection and can evolve traits to jointly overcome plant defenses,  
532 without the cultivated plants being able to coevolve to resist these traits. The  
533 plants are at the mercy of human selection, which is focused at traits that favor  
534 yield and nutritional value, often at the cost of reduced resistance against  
535 pests and diseases <sup>60,61</sup>. Yet, as we discover and unravel the intricate  
536 adaptations in the insects we can start steering this human selection in favor of  
537 potent pest resistance traits. For the specific example uncovered in our study,  
538 interfering with the ability of BPH to suppress the biosynthesis of proteinase  
539 inhibitors could be a highly effective and sustainable strategy to control two of  
540 rice's most common and most harmful pests.

541 In summary, the current study reveals a highly adaptive, mutually beneficial  
542 relationship between rice planthoppers and stem borers that is mediated by  
543 opposing rice plant defense responses. The findings represent a unique

544 example of a cooperative interaction that challenges traditional interspecific  
545 competition theory. The two insect species take advantage of the rice defense  
546 responses induced by each other in a manner that suggests that together they  
547 are the tentative winners in the arms race with rice plants. The results are also  
548 illustrative of the complexity and intricate dynamics of the interaction between  
549 plants and insects, and challenge the conventional paradigms of interspecific  
550 competition. Future work should further unravel more details about the  
551 molecular mechanisms underlying the insect-controlled interactions, which  
552 might lead the development of rice varieties that disrupt the cooperative  
553 interaction as potential strategy to control the two pests.

554

## 555 **Methods**

### 556 **Plants and insects**

557 Rice plants (*Oryza sativa*, cultivar Minghui63) were grown in a greenhouse at  
558  $27 \pm 3$  °C with  $75 \pm 10\%$  RH (relative humidity) and a photoperiod of 16:8 hr  
559 L:D (light:dark). The cultivation of rice plants followed the same procedure as  
560 described previously<sup>25</sup>. Plants were used for experiments when they were at  
561 the tillering stage, which occurred about 44–49 days after sowing.

562 *C. suppressalis* larvae were reared on an artificial diet as described<sup>62</sup>. Ten  
563 percent honey water solution was provided to supply nutrition for the adults. *N.*  
564 *lugens* were maintained on a BPH-susceptible rice variety Taichung Native 1  
565 (TN1)<sup>34</sup>. *T. japonicun* were obtained from Keyun Industry Co., Ltd (Jiyuan,  
566 China). Newly emerged adult wasps were maintained in glass tubes (3.5 cm  
567 diameter, 20 cm height) and supplied with 10% honey water solution as a food  
568 source and were maintained for at least 6 hr to ensure freely mating, before  
569 females were used for the following experiments. All three species were  
570 maintained in climatic chambers at  $27 \pm 1$ °C,  $75 \pm 5\%$  RH, and a photoperiod  
571 of 16:8 hr L:D.

572

### 573 **Performance of caterpillars on insect-infested rice plants**

574 Multiple types of rice plants were prepared: i) uninfested plants, meaning that  
575 potted rice plants remained intact without insect infestation; (ii) SSB-infested  
576 plants, each potted rice plant was artificially infested with one 3<sup>rd</sup> instar SSB  
577 larva that had been starved for > 3 hr for 48 hr; iii) BPH-infested plants, each  
578 potted rice plant was artificially infested with a mix of fifteen 3<sup>rd</sup> and 4<sup>th</sup> instars  
579 BPH nymphs for 48 hr; iv) SSB/BPH-infested plants, each potted rice plant  
580 was simultaneously infested with one SSB larva and 15 BPH nymphs for 48 hr;  
581 (v) SSB→BPH-infested plants, each potted rice plant was artificially infested  
582 with one SSB larvae alone for the first 24 hr, then 15 BPH nymphs were  
583 additionally introduced for another 24 hr; vi) BPH→SSB-infested plants,  
584 namely each potted rice plant was artificially infested with 15 BPH nymphs for  
585 the first 24 hr, then one SSB larvae were additionally introduced for another 24  
586 hr. Plant treatments were conducted as described in detail in our previous  
587 study <sup>25</sup>. During herbivory treatment, the uninfested plants were placed in a  
588 separate room to avoid possible volatile-mediated interference. During the  
589 subsequent bioassays, both SSB caterpillar and BPH nymphs remained in or  
590 on the rice plants.

591 Two bioassays were conducted to test the performance of *C. suppressalis*  
592 larvae feeding on differently treated rice plants. The first bioassay included the  
593 plants treatments i, ii, iii, and vi, and the second bioassay included the plants  
594 treatments i, ii, v and vi. Three 2-day-old larvae of *C. suppressalis* were gently  
595 introduced onto the middle stem of each rice plant using a soft brush. The  
596 infested rice plants were then placed in climatic chambers at  $27 \pm 1^\circ\text{C}$ ,  $75 \pm 5\%$   
597 relative humidity, and a photoperiod of 16:8 hr L:D. The *C. suppressalis* larvae  
598 were retrieved from the rice plants after 7 days feeding, and they were  
599 weighed on a precision balance (CPA2250, Sartorius AG, Germany;  
600 readability = 0.01 mg). The mean weight of the three caterpillars on each plant  
601 was considered as one biological replicate. The experiment was repeated four  
602 times using different batches of plants and herbivores, resulting in a total of  
603 30–46 biological replicates for each treatment.

604

605 **Oviposition-preferences of *C. suppressalis* females choosing among**  
606 **differently infested rice plants**

607 ***Greenhouse experiment***

608 In the greenhouse, seven choice tests were conducted with *C. suppressalis*  
609 females including i) SSB-infested plants versus uninfested plants; ii)  
610 BPH-infested plants versus uninfested plants; iii) SSB/BPH-infested plants  
611 versus uninfested plants; iv) SSB-infested plants versus BPH-infested plants; v)  
612 SSB-infested plants versus SSB/BPH-infested plants; vi) BPH-infested plants  
613 versus SSB/BPH-infested plants; and vii) the test in which *C. suppressalis*  
614 females were exposed to all four types of rice plants. The experiments were  
615 performed as described in detail by <sup>30</sup>. In brief, four potted plants were  
616 positioned in the 4 corners of a cage (80 cm x 80 cm x 100 cm) made of  
617 80-mesh nylon nets for each test. For paired comparisons, two potted plants  
618 belonging to the same treatment were placed in opposite corners of each cage,  
619 and in the test with 4 types of rice plants, each type of plant was positioned in  
620 one of the four corners of each cage. Five pairs of freshly emerged moths (less  
621 than 1 day) were released in each cage, and a clean Petri dish (9 cm diameter)  
622 containing a cotton ball soaked with a 10% honey solution was placed in the  
623 center of the cage as food source. After 72 h, the number of individual eggs on  
624 each plant were determined. The experiment was conducted in a greenhouse  
625 at  $27 \pm 3^{\circ}\text{C}$ ,  $65 \pm 10\%$  RH, and a photoperiod of 16:8 hr L:D. Each choice test  
626 was repeated with 9–11 times (replicates).

627 ***Field cage experiment***

628 The oviposition preference of SSB females was further assessed in a field  
629 near Langfang City (39.58° N, 116.48° E), China. Four choice tests were  
630 conducted: i) SSB-infested plants versus uninfested plants; ii) BPH-infested  
631 plants versus uninfested plants; iii) SSB/BPH-infested plants versus uninfested  
632 plants; and iv) SSB/BPH-infested plants versus SSB-infested plants. The  
633 treated rice plants were prepared as described above and were transplanted



634 into experimental plots (1.5 m × 1.5 m). For each pairwise comparison, six  
635 plots of rice plants were covered with a screened cage (8 m × 5 m × 2.5 m)  
636 made of 80-mesh nylon net to prevent moths from entering or escaping. Each  
637 of the six plots contained 9 rice plants of a particular treatment, with 3 plots per  
638 cage representing the same treatment. Plots were separated by a 1-m buffer  
639 and they were alternately distributed in a 3 × 2 grid arrangement in each cage  
640 (Supplementary Fig. 1). Approximately 50 mating pairs of newly emerged *C.*  
641 *suppressalis* adults (< 24 hr) were released into each cage. After 72 hr, the  
642 number of individual eggs on each plant were determined. The total number of  
643 eggs of three plots in each cage was regarded as one replicate, 3–4 replicates  
644 were conducted for each pairwise comparisons.

645

#### 646 **Rice plant response to herbivore infestation**

##### 647 ***RNA-seq and data analysis***

648 To explore the molecular mechanisms underlying the rice plant-mediated  
649 interaction between BPH and SSB, gene expression changes in rice response  
650 to infestation by SSB, BPH or both were analyzed by RNA-seq. The rice plants,  
651 uninfested (control) or infested, were prepared as described above. After 48h,  
652 the stems of the plants were harvested and frozen in liquid nitrogen. Samples  
653 from 5 individual plants of the same treatment were pooled together as one  
654 biological replicate, and three replicates were collected for each treatment.

655 RNA-seq analyses were performed as described previously<sup>63</sup>. In brief, total  
656 RNA was extracted using the TRIzol reagent (Invitrogen, Carlsbad, CA, USA)  
657 and treated with RNase-free DNase I (NEB, Ipswich, MA, USA) to remove any  
658 genomic DNA. Library preparation and RNA-seq were performed by Novogene  
659 (Beijing, China) using an Illumina Hiseq 4000 system, resulting in ~45–55  
660 million raw reads per sample. Raw reads were subjected to quality checking  
661 and trimming to remove adapters, poly-N sequences, and low-quality bases  
662 (Phred quality score Q < 20). The yield clean data of each sample were  
663 aligned to the rice reference genome IRGSP-1.0 (<https://rapdb.dna.affrc.go.jp>)



664 using HISAT2 (v2.09) <sup>64</sup>, and the number of reads mapped to each gene was  
665 counted with featureCounts (v1.5.0-p3) <sup>65</sup>. The expression level of each gene  
666 was calculated as FPKM (fragments per kilobase of transcript per million per  
667 million fragments mapped) according to an established protocol <sup>66</sup>. Expression  
668 differentiation analyses were conducted DESeq2 R package (v. 1.18.0) <sup>67</sup>.  
669 Genes with absolute value of  $\log_2(\text{fold change}) > 0$  and  $P\text{-value} < 0.05$  were  
670 defined as differentially expressed genes (DEGs). The enriched functions of  
671 DEGs in RNA-seq data sets were annotated with the Gene Ontology (GO)  
672 function using the clusterProfiler R package <sup>68</sup>, and GO terms with Benjamini–  
673 Hochberg false discovery rate (FDR) adjusted  $P\text{-value} (Padj) < 0.05$  were  
674 considered significantly enriched. The transcriptional signatures of hormonal  
675 responses of rice plant to herbivory relative to gene expression in *Arabidopsis*  
676 induced by diverse phytohormones was analyzed using Hormonometer  
677 program <sup>69</sup>. Since trypsin protease inhibitors (TPIs) serve as indicators of  
678 induced resistance in rice plants, especially against chewing herbivores such  
679 as SSB <sup>35,36</sup>, the analyses focused on expression profiles of TPIs-related  
680 genes among the four plant treatments. The expression of nine selected TPIs  
681 genes were validated by quantitative real-time PCR (qRT-PCR) analyses as  
682 previously described <sup>70</sup>. qRT-PCR was conducted on a Bio-RadCFX96 Touch  
683 Real-time PCR Detection System instrument (Bio-Rad, Hercules, CA, USA)  
684 using TransStart<sup>®</sup> Top Green qPCR SuperMix (TransGen Biotech, Beijing,  
685 China). The rice *ubiquitin 5* gene was used as the internal standard to  
686 normalize the variations in gene expression. The primers used are listed in  
687 Supplementary Table 1.

688

### 689 ***Quantification of endogenous jasmonic and salicylic acid***

690 Our RNA-seq results suggested that additional infestation by BPH significantly  
691 suppressed the expressions of genes related to the defense hormones  
692 jasmonic acid (JA) and salicylic acid (SA). Both types of genes are highly  
693 upregulated in response to SSB infestation <sup>71</sup>. To confirm this, we quantified

694 the JA and SA levels in rice plants with two treatments: i) rice plants that were  
695 infested with one third-instar SSB larva alone for 24 hr; ii) rice plants that were  
696 first infested with one third-instar SSB larva for 12 hr and then also with 15  
697 BPH female adults for another 12 hr. Rice stems were harvested at three time  
698 points: 0 hr (uninfested control plants), as well as 12 hr and 24 hr after  
699 infestation. For each treatment, stems from 5 individual plants were harvested  
700 and pooled together as one biological replicate, and three replicates were  
701 collected for each time point.

702 Endogenous measurements of JA and SA were performed by the plant  
703 hormone platform at the Institute of Genetics and Developmental Biology,  
704 Chinese Academy of Sciences as previously described<sup>72</sup>.

#### 705 ***Quantification of TPIs***

706 We further measured the accumulation of TPIs in rice plants subjected to  
707 insect infestation. These experiments were prompted by the RNA-seq results  
708 indicating that the upregulation of TPIs-related genes in response to SSB  
709 infestation is significantly suppressed after co-infestation with BPH. The same  
710 plant treatments were included as used for RNA-seq but with new batches of  
711 plants. Samples were collected at 48 hr and 72 hr of insect infestation. Intact  
712 rice plants that served as controls were also sampled at the same time points.  
713 Samples from five individual plants were pooled together as one biological  
714 replicate, and three replicates were collected for each treatment. All samples  
715 were immediately frozen in liquid nitrogen and stored at  $-80^{\circ}\text{C}$  until further  
716 analyses.

717 TPIs contents was determined using enzyme linked immunosorbent assay  
718 (ELISA) kits (J&L Biological, Shanghai, China). The stem samples were  
719 ground into a fine power in liquid nitrogen using a mortar and pestle, and each  
720 sample (0.1 g) was homogenized in 0.01 M PBS (Phosphate Buffered Saline)  
721 buffer (pH = 7.4) (Sigma-Aldrich, St. Louis, MO, USA) with a sample–PBS  
722 proportion of 1:9 (1 g plant sample/9 ml of PBS). Samples were centrifuged at  
723 4000 *g* for 15 min at  $4^{\circ}\text{C}$  and the supernatant was collected. The ELISA

724 experiments were performed following the protocols provided with the kits. The  
725 optical density values were recorded at 450 nm using a microplate  
726 spectrophotometer (PowerWave XS2, BioTek, Winooski, VT, USA). The  
727 protein concentrations in plant samples were measured using a bicinchoninic  
728 acid (BCA) protein assay kit (Aidlab Biotechnologies Co., Ltd., Beijing, China)  
729 according to the manufacturer's instructions. The amount of protease inhibitor  
730 was calculated based on a standard curve, and results were expressed as  $\mu\text{g}$   
731 protease inhibitor per mg protein.

732

### 733 **Effect of insect-induced volatiles on the oviposition behavior of SSB** 734 **moths**

#### 735 ***Collection and analysis of rice plant volatiles***

736 Individual rice plants were either uninfested or infested with SSB larvae alone,  
737 BPH nymphs alone, or both species simultaneously for 48 hr using the method  
738 described above. The emitted volatiles were trapped for 3 hr (21:00–24:00, the  
739 time period that SSB lay their eggs), and then analyzed and identified as  
740 described<sup>25</sup>. The compounds were quantified as a percentage of peak areas  
741 relative to the internal standard (nonyl acetate) per 3 hr of trapping for one  
742 plant. For each treatment, collections and analyses were repeated 7–9 times.

#### 743 ***Odor preferences of SSB females***

744 The response of SSB females to volatiles released from differently treated rice  
745 plants were investigated to better understand the mechanism underlying the  
746 moth's oviposition preferences. The total volatiles emitted from uninfested  
747 plants, SSB-infested plants, BPH-infested plants and SSB/BPH-infested plants  
748 were collected for this experiment. Plant treatments and volatiles collections  
749 were the same as described above but without the addition of the internal  
750 standard. The collected volatiles were diluted in paraffin oil (purity 99%;  
751 Sigma-Aldrich, St. Louis, MO, USA) at 1:4 (v/v) and were stored at  $-80\text{ }^{\circ}\text{C}$   
752 before use.

753 One ml of each of the four types of volatile solutions were separately

754 pipetted on the center of a filter paper strip (4 cm × 21 cm), which were then  
755 hung from the four corners of a cage (45 cm × 45 cm × 45 cm) made of  
756 80-mesh nylon net. Five pairs of freshly emerged SSB moths (< 24 hr) were  
757 released in each cage. After 72 hr, the number of eggs deposited on the filter  
758 paper strips and the surface of the nylon nets near each paper strip were  
759 determined. This oviposition choice test was repeated 8 times.

760

761 **Response of the egg parasitoid *T. japonicum* to herbivore-infested rice**  
762 **plants**

763 Multiple types of herbivore-infested rice plants were prepared: i) uninfested  
764 plants (control); ii) SSB-infested plants; iii) BPH-infested plants; iv)  
765 SSB/BPH-infested plants; v) plants infested with SSB eggs (referred to as  
766 egg-infested plants); vi) plant infested with SSB larvae and their eggs (referred  
767 to as SSB/egg-infested plants); vii) plants infested with BPH nymphs and SSB  
768 eggs (BPH/egg-infested plants); and viii) plants infested with both SSB larvae,  
769 BPH nymphs and SSB eggs (referred to as SSB/BPH/egg-infested plants). To  
770 prepare these treatments, plants were first artificially infested with herbivores  
771 for 48 hr as described above, then some of them were subjected to SSB eggs  
772 deposition. For that, two potted rice plants of the same type were placed in a  
773 cage (45 cm × 45 cm × 45 cm) made of 80-mesh nylon nets, then 30 pairs of  
774 freshly emerged moths (< 24 hr) were released in each cage to mate and lay  
775 eggs. After 24 hr, the plants were removed from the cage and those that  
776 carried 200-250 eggs were used as odor sources. During the period of egg  
777 deposition and the subsequent olfactometer experiments with the parasitoid,  
778 all insects remained in or on the rice plants.

779 To test the behavioral responses of *T. japonicum* to differently treated rice  
780 plants, they were offered the following pairs of odor sources: i) uninfested  
781 plants versus egg-infested plants; ii) uninfested plants versus SSB-infested  
782 plants; iii) uninfested plants versus BPH-infested plants; iv) egg-infested plants  
783 versus SSB/egg-infested plants; v) egg-infested plants versus BPH/eggs

784 infested plants; vi) SSB/egg-infested plants versus BPH/egg-infested plants;  
785 vii) egg-infested plants versus SSB/BPH/egg-infested plants; viii)  
786 SSB/egg-infested plants versus SSB/BPH/egg-infested plants; and ix)  
787 BPH/egg-infested plants versus SSB/BPH/egg-infested plants.

788 Responses of *T. japonicum* females to these odor sources were investigate  
789 in a Y-tube olfactometer as described <sup>25</sup>. Newly emerged adult wasps were  
790 maintained in glass tubes (3.5 cm diameter, 20 cm height) for at least 6 hr to  
791 ensure that they would mate, before females were used for the experiments.  
792 Two rice plants of the same treatment were enclosed in a glass bottle and  
793 used as one odor source, and each pair of odor sources was replaced after ten  
794 parasitic wasps were tested. For each treatment, a total of 64–88 female  
795 wasps were tested. The experiments were conducted between 10:00 and  
796 16:00 on several consecutive days.

797

#### 798 **Parasitism rates of *C. suppressalis* eggs by *T. japonicum* wasps**

799 In a cage experiment, we further tested if the differences in parasitoid  
800 attraction observed in the olfactometer for the differentially infested plants can  
801 result in differences in parasitism rates of SSB eggs under realistic conditions.  
802 The following herbivore-treated plants were prepared as described above:  
803 SSB eggs on uninfested, SSB-infested, BPH-infested and SSB/BPH-infested  
804 plants. The four types of plants were placed in the four corners of a cage  
805 (60cm × 60 cm × 60 cm) made of 80-mesh nylon nets, respectively.  
806 Subsequently, 40 pairs of newly emerged wasps (<1 day old) were released  
807 into the cage. After 48 hr, the rice leaves with SSB eggs were collected, and  
808 the total number of SSB eggs on each plant was counted and their  
809 parasitization status was determined under a microscope two days later; the  
810 eggs turned black after being parasitized for 3 days. The experiment was  
811 replicated 12 times. The experiment was performed in a greenhouse at 27 ±  
812 3°C and with 75 ± 10% RH and a photoperiod of 16:8 hr L:D.

813

814 **Statistical analyses**

815 All data were checked for normality and equality of variances prior to statistical  
816 analysis. Likelihood ratio test (LR test) applied to a generalized lineal mixed  
817 model (GLMM) for overdispersion and grouped design were conducted to  
818 compare the number of eggs laid by SSB females on rice plants (Poisson error  
819 structure with log link function). Likelihood ratio test (LR test) applied to a  
820 generalized lineal model (GLM) were conducted to compare the parasitism  
821 rates of SSB eggs by *T. japonicun* (normal distribution error) with the cage  
822 treated as a random factor; the percentage data of parasitism rates were  
823 arcsin square-root transformed prior to analyses. Two-way analysis of variance  
824 (ANOVA) followed by least significant difference (LSD) test was used to  
825 compare the body weight increases of the SSB larvae on different plant  
826 treatments. The contents of JA and SA in different samples was analyzed  
827 using one-way ANOVA followed by Tukey honest significant difference (HSD)  
828 test or two-sided Student's *t*-test. Behavioral responses of *T. japonicun* in  
829 Y-tube assays were analyzed using binomial test with an expected response of  
830 50% for either olfactometer arm; parasitoids that did not make a choice were  
831 excluded from the analysis. Differences in volatile emission and in gene  
832 expression were analyzed by partial least squares-discriminant analysis  
833 (PLS-DA)<sup>25,55</sup> using SIMCA 14.1 software (Umetrics, Umeå, Sweden). The  
834 omics data were normalized by medians, log-transformed, and then  
835 auto-scaled (mean centered and divided by the standard deviation of each  
836 variable) using Metaboanalyst 4.0 software<sup>73</sup> before they were subjected to  
837 PLS-DA. All statistical analyses were conducted with SPSS 22.0 (IBM SPSS,  
838 Somers, NY, USA), except for the PLS-DA were performed using SIMCA 14.1  
839 software.

840

841 **Data availability**

842 RNA-seq raw data have been deposited to the Gene Expression Omnibus  
843 (GEO) database in the National Center for Biotechnology Information (NCBI)

844 (note: accession number is not open yet). All other relevant data are available  
845 from the corresponding author upon reasonable request.

846

### 847 **Acknowledgements**

848 The study was supported by the National Natural Science Foundation of China  
849 (31972984 and 31901896). The contribution by T.C.J.T. was supported by  
850 European Research Council Advanced Grant 788949.

851

### 852 **Author contributions**

853 Y.Li conceived and directed the project. Y.Li, Q.L., X.H., and T.C.J.T. designed  
854 the study. X.H. and S.S. performed the experiments. Q.L., X.H., S.S., Y.Li, and  
855 T.C.J.T analyzed the data. Q.L., X.H., S.S., Y.P., G.Y., Y.Lou, T.C.J.T., and Y.Li  
856 wrote the manuscript. All authors have read and approved the manuscript for  
857 publication.

858

### 859 **Competing interests**

860 The authors declare no competing financial interests.

861

### 862 **Additional information**

863 **Supplementary information** The online version contains supplementary  
864 material available.

865 **Correspondence** and requests for materials should be addressed to Y.Li.

866

867

### 868 **References**

- 869 1 Kaplan, I. & Denno, R. F. Interspecific interactions in phytophagous  
870 insects revisited: a quantitative assessment of competition theory. *Ecol.*  
871 *Lett.* **10**, 977-994 (2007).
- 872 2 Ohgushi, T. in *Trait-mediated indirect interactions: ecological and*  
873 *evolutionary perspective* (eds T. Ohgushi, O. Schmitz, & R.D. Holt)  
874 161-185 (Cambridge University Press, 2012).
- 875 3 Yamauchi, A., Ikegawa, Y., Ohgushi, T. & Namba, T. Density regulation



- 876 of co-occurring herbivores via two indirect effects mediated by biomass  
877 and non-specific induced plant defenses. *Theor. Ecol.* Doi:  
878 10.1007/s12080-020-00479-2 (2020).
- 879 4 Tilman, D. *Resource competition and community structure*. (Princeton  
880 university press, 1982).
- 881 5 Foster, K. R. & Bell, T. Competition, not cooperation, dominates  
882 interactions among culturable microbial species. *Curr. Biol.* **22**,  
883 1845-1850 (2012).
- 884 6 Elias, S. & Banin, E. Multi-species biofilms: living with friendly neighbors.  
885 *FEMS Microbiol. Rev.* **36**, 990-1004 (2012).
- 886 7 Little, A. E., Robinson, C. J., Peterson, S. B., Raffa, K. F. & Handelsman,  
887 J. Rules of engagement: interspecies interactions that regulate  
888 microbial communities. *Annu. Rev. Microbiol.* **62**, 375-401 (2008).
- 889 8 Lohberger, A. et al. Effect of organic carbon and nitrogen on the  
890 interactions of *Morchella* spp. and bacteria dispersing on their mycelium.  
891 *Front. Microbiol.* **10**, 124 (2019).
- 892 9 Bshary, R., Hohner, A., Ait-el-Djoudi, K. & Fricke, H. Interspecific  
893 communicative and coordinated hunting between groupers and giant  
894 moray eels in the Red Sea. *PLoS Biol.* **4**, e431 (2006).
- 895 10 Vail, A. L., Manica, A. & Bshary, R. Referential gestures in fish  
896 collaborative hunting. *Nat. Commun.* **4**, 1765 (2013).
- 897 11 Sfarra, A. *10 amazing acts of cooperation between different animal*  
898 *species*,  
899 <<https://listverse.com/2015/02/23/10-amazing-cooperations-between-different-animal-species/>> (2015).
- 901 12 Parmentier, T., Yéo, K., Dekoninck, W. & Wenseleers, T. An apparent  
902 mutualism between Afrotropical ant species sharing the same nest.  
903 *Behav. Ecol. Sociobiol.* **71** (2017).
- 904 13 Yao, I. Costs and constraints in aphid-ant mutualism. *Ecol. Res.* **29**,  
905 383-391 (2014).
- 906 14 Debbie, H. *How ants and aphids help each other*, <  
907 <https://www.thoughtco.com/aphid-herding-ants-1968237>>(2019).
- 908 15 Denno, R. F., McClure, M. S. & Ott, J. R. Interspecific Interactions in  
909 Phytophagous Insects: Competition Reexamined and Resurrected.  
910 *Annu. Rev. Entomol.* **40**, 297-331 (1995).
- 911 16 Poelman, E. H. & Dicke, M. in *Annual Plant Reviews: Insect - Plant*  
912 *Interactions* Vol. 47 (eds C. Voelckel & G. Jander) 309-338  
913 (Wiley-Blackwell, 2014).
- 914 17 Stam, J. M. et al. Plant interactions with multiple insect herbivores: from  
915 community to genes. *Annu. Rev. Plant Biol.* **65**, 689-713 (2014).
- 916 18 Li, X. et al. Reduced *Mythimna separata* infestation on *Bt* corn could  
917 benefit aphids. *Insect Sci.* doi: 10.1111/1744-7917.12833 (2020).
- 918 19 Nakamura, M., Miyamoto, Y. & Ohgushi, T. Gall initiation enhances the  
919 availability of food resources for herbivorous insects. *Funct. Ecol.* **17**,



- 920 851-857 (2003).
- 921 20 Soler, R. et al. Plant-mediated facilitation between a leaf-feeding and a  
922 phloem-feeding insect in a brassicaceous plant: from insect  
923 performance to gene transcription. *Funct. Ecol.* **26**, 156-166 (2012).
- 924 21 Su, Q. et al. A non-vector herbivore indirectly increases the  
925 transmission of a vector-borne virus by reducing plant chemical  
926 defences. *Funct. Ecol.* **34**, 1091-1101 (2020).
- 927 22 Utsumi, S. & Ohgushi, T. Host plant variation in plant-mediated indirect  
928 effects: moth boring - induced susceptibility of willows to a specialist  
929 leaf beetle. *Ecol. Entomol.* **33**, 250-260 (2008).
- 930 23 Shiojiri, K., Takabayashi, J., Yano, S. & Takafuji, A. Oviposition  
931 preferences of herbivores are affected by tritrophic interaction webs.  
932 *Ecol. Lett.* **5**, 186-192 (2002).
- 933 24 Desurmont, G. A., Guiguet, A. & Turlings, T. C. J. Invasive insect  
934 herbivores as disrupters of chemically-mediated tritrophic interactions:  
935 effects of herbivore density and parasitoid learning. *Biol. Invasions* **20**,  
936 195-206 (2017).
- 937 25 Hu, X. et al. Caterpillar-induced rice volatiles provide enemy-free space  
938 for the offspring of the brown planthopper. *eLife* **9**, e55421 (2020).
- 939 26 Zhang, P. J. et al. Whiteflies interfere with indirect plant defense against  
940 spider mites in Lima bean. *Proc Natl Acad Sci USA* **106**, 21202-21207  
941 (2009).
- 942 27 Desurmont, G. A., Zemanova, M. A. & Turlings, T. C. The gastropod  
943 menace: slugs on Brassica plants affect caterpillar survival through  
944 consumption and interference with parasitoid attraction. *J. Chem. Ecol.*  
945 **42**, 183-192 (2016).
- 946 28 Zarate, S. I., Kempema, L. A. & Walling, L. L. Silverleaf whitefly induces  
947 salicylic acid defenses and suppresses effectual jasmonic acid  
948 defenses. *Plant Physiol.* **143**, 866-875 (2007).
- 949 29 Chen, M., Shelton, A. & Ye, G. Y. Insect-resistant genetically modified  
950 rice in China: from research to commercialization. *Annu. Rev. Entomol.*  
951 **56**, 81-101 (2011).
- 952 30 Jiao, Y. et al. *Bt* rice plants may protect neighbouring non-*Bt* rice plants  
953 against the striped stem borer, *Chilo suppressalis*. *Proc. R. Soc. B* **285**,  
954 20181283 (2018).
- 955 31 Ye, M. et al. Suppression of a leucine-rich repeat receptor-like kinase  
956 enhances host plant resistance to a specialist herbivore. *Plant Cell*  
957 *Environ.* **43**, 2571-2585 (2020).
- 958 32 Lu, H. P. et al. Resistance of rice to insect pests mediated by  
959 suppression of serotonin biosynthesis. *Nat. Plants* **4**, 338-344 (2018).
- 960 33 Barker, J. L. et al. Synthesizing perspectives on the evolution of  
961 cooperation within and between species. *Evolution* **71**, 814-825 (2017).
- 962 34 Wang, X. et al. *Bt* rice could provide ecological resistance against  
963 nontarget planthoppers. *Plant Biotechnol. J.* **16**, 1748-1755 (2018).

- 964 35 Lu, J. et al. Contrasting effects of ethylene biosynthesis on induced  
965 plant resistance against a chewing and a piercing-sucking herbivore in  
966 rice. *Mol. Plant* **7**, 1670-1682 (2014).
- 967 36 Zhou, G. et al. Silencing *OsHI-LOX* makes rice more susceptible to  
968 chewing herbivores, but enhances resistance to a phloem feeder. *Plant*  
969 *J.* **60**, 638-648 (2009).
- 970 37 Ye, M. et al. silencing *COI1* in rice increases susceptibility to chewing  
971 insects and impairs inducible defense. *PloS one* **7**, e36214 (2012).
- 972 38 Wu, J. & Baldwin, I. T. New insights into plant responses to the attack  
973 from insect herbivores. *Annu. Rev. Genet.* **44**, 1-24 (2010).
- 974 39 Erb, M. & Reymond, P. Molecular interactions between plants and  
975 insect herbivores. *Annu. Rev. Plant Biol.* **70**, 527-557 (2019).
- 976 40 Farmer, E. E. *Leaf defence*. (Oxford University Press, 2014).
- 977 41 Mao, Y. B. et al. Jasmonate response decay and defense metabolite  
978 accumulation contributes to age-regulated dynamics of plant insect  
979 resistance. *Nat. Commun.* **8**, 13925 (2017).
- 980 42 Sarmiento, R. A. et al. A herbivore that manipulates plant defence. *Ecol.*  
981 *Lett.* **14**, 229-236 (2011).
- 982 43 De Lange, E. S. et al. *Spodoptera frugiperda* caterpillars suppress  
983 herbivore-induced volatile emissions in maize. *J. Chem. Ecol.* **46**,  
984 344-360 (2020).
- 985 44 Walling, L. L. Avoiding effective defenses: strategies employed by  
986 phloem-feeding insects. *Plant Physiol.* **146**, 859-866 (2008).
- 987 45 Will, T., Tjallingii, W. F., Thonnessen, A. & van Bel, A. J. Molecular  
988 sabotage of plant defense by aphid saliva. *Proc Natl Acad Sci USA* **104**,  
989 10536-10541 (2007).
- 990 46 Gripenberg, S., Mayhew, P. J., Parnell, M. & Roslin, T. A meta-analysis  
991 of preference-performance relationships in phytophagous insects. *Ecol.*  
992 *Lett.* **13**, 383-393 (2010).
- 993 47 Turlings, T. C. J. & Erb, M. Tritrophic interactions mediated by  
994 herbivore-induced plant volatiles: mechanisms, ecological relevance,  
995 and application potential. *Annu. Rev. Entomol.* **63**, 433-452 (2018).
- 996 48 Tooker, J. F., Rohr, J. R., Abrahamson, W. G. & De Moraes, C. M. Gall  
997 insects can avoid and alter indirect plant defenses. *New Phytol.* **178**,  
998 657-671 (2008).
- 999 49 Hogenhout, S. A. & Bos, J. I. Effector proteins that modulate  
1000 plant-insect interactions. *Curr. Opin. Plant Biol.* **14**, 422-428 (2011).
- 1001 50 Zu, P. et al. Information arms race explains plant-herbivore chemical  
1002 communication in ecological communities. *Science* **368**, 1377-1381  
1003 (2020).
- 1004 51 Gause, G. F. *The struggle for existence*. (Williams & Wilkins, 1934).
- 1005 52 Park, T. Experimental studies of interspecies competition. 1.  
1006 Competition between populations of the flour beetles, *Tribolium*  
1007 *confusum* Duval and *Tribolium castaneum* Herbst. *Ecol. Monogr.* **18**,

- 1008 265-307 (1948).
- 1009 53 Janzen, D. H. Host plants as islands. II. Competition in evolutionary and  
1010 contemporary time. *Am. Nat.* **107**, 786-790 (1973).
- 1011 54 Kant, M. R. et al. Mechanisms and ecological consequences of plant  
1012 defence induction and suppression in herbivore communities. *Ann. Bot.*  
1013 **115**, 1015-1051 (2015).
- 1014 55 Zhang, P. J. et al. Jasmonate and ethylene signaling mediate  
1015 whitefly-induced interference with indirect plant defense in *Arabidopsis*  
1016 *thaliana*. *New Phytol.* **197**, 1291-1299 (2013).
- 1017 56 Ali, J. G., Agrawal, A. A. & Fox, C. Asymmetry of plant-mediated  
1018 interactions between specialist aphids and caterpillars on two  
1019 milkweeds. *Funct. Ecol.* **28**, 1404-1412 (2014).
- 1020 57 Ray, S. et al. Asymmetry in herbivore effector responses: caterpillar  
1021 frass effectors reduce performance of a subsequent herbivore. *J. Chem.*  
1022 *Ecol.* **46**, 76-83 (2020).
- 1023 58 Chisholm, P. J., Eigenbrode, S. D., Clark, R. E., Basu, S. & Crowder, D.  
1024 W. Plant-mediated interactions between a vector and a non-vector  
1025 herbivore promote the spread of a plant virus. *Proc. Biol. Sci.* **286**,  
1026 20191383 (2019).
- 1027 59 Jiang, Y., Zhang, C. X., Chen, R. & He, S. Y. Challenging battles of  
1028 plants with phloem-feeding insects and prokaryotic pathogens. *Proc*  
1029 *Natl Acad Sci USA* **116**, 23390-23397 (2019).
- 1030 60 Johnson, S. N., Karley, A. J., Gregory, P. J. & Brennan, R. M. Editorial:  
1031 Crop traits for defense against pests and disease: durability, breakdown  
1032 and future prospects. *Front. Plant Sci.* **8**, 209 (2017).
- 1033 61 Chen, Y. H., Gols, R. & Benrey, B. Crop domestication and its impact on  
1034 naturally selected trophic interactions. *Annu. Rev. Entomol.* **60**, 35-58  
1035 (2015).
- 1036 62 Han, L., Li, S., Liu, P., Peng, Y. & Hou, M. New artificial diet for  
1037 continuous rearing of *Chilo suppressalis* (Lepidoptera: Crambidae). *Ann.*  
1038 *Entomol. Soc. Am.* **105**, 253-258 (2012).
- 1039 63 Liu, Q. et al. Plant breeding involving genetic engineering does not  
1040 result in unacceptable unintended effects in rice relative to conventional  
1041 cross-breeding. *Plant J.* **103**, 2236-2249 (2020).
- 1042 64 Kim, D., Langmead, B. & Salzberg, S. L. HISAT: a fast spliced aligner  
1043 with low memory requirements. *Nat. Methods* **12**, 357-360 (2015).
- 1044 65 Liao, Y., Smyth, G. K. & Shi, W. featureCounts: an efficient general  
1045 purpose program for assigning sequence reads to genomic features.  
1046 *Bioinformatics* **30**, 923-930 (2014).
- 1047 66 Garber, M., Grabherr, M. G., Guttman, M. & Trapnell, C. Computational  
1048 methods for transcriptome annotation and quantification using RNA-seq.  
1049 *Nat. Methods* **8**, 469-477 (2011).
- 1050 67 Love, M. I., Huber, W. & Anders, S. Moderated estimation of fold change  
1051 and dispersion for RNA-seq data with DESeq2. *Genome Biol.* **15**, 550

- 1052 (2014).  
1053 68 Yu, G., Wang, L., Han, Y. & He, Q. clusterProfiler: an R package for  
1054 comparing biological themes among gene clusters. *OMICS: J.*  
1055 *Integrative Biol.* **16**, 284-287 (2012).  
1056 69 Volodarsky, D., Leviatan, N., Otcheretianski, A. & Fluhr, R.  
1057 HORMONOMETER: a tool for discerning transcript signatures of  
1058 hormone action in the *Arabidopsis* transcriptome. *Plant Physiol.* **150**,  
1059 1796-1805 (2009).  
1060 70 Wang, Y., Liu, Q., Du, L., Hallerman, E. M. & Li, Y. Transcriptomic and  
1061 metabolomic responses of rice plants to *Cnaphalocrocis medinalis*  
1062 caterpillar infestation. *Insects* **11**, 705 (2020).  
1063 71 Liu, Q. et al. Combined transcriptome and metabolome analyses to  
1064 understand the dynamic responses of rice plants to attack by the rice  
1065 stem borer *Chilo suppressalis* (Lepidoptera: Crambidae). *BMC Plant*  
1066 *Biol.* **16**, 259 (2016).  
1067 72 Fu, J., Chu, J., Sun, X., Wang, J. & Yan, C. Simple, rapid, and  
1068 simultaneous assay of multiple carboxyl containing phytohormones in  
1069 wounded tomatoes by UPLC-MS/MS using single SPE purification and  
1070 isotope dilution. *Anal. Sci.* **28**, 1081-1087 (2012).  
1071 73 Chong, J. et al. MetaboAnalyst 4.0: towards more transparent and  
1072 integrative metabolomics analysis. *Nucleic Acids Res.* **46**, W486-W494  
1073 (2018).  
1074
